# Supplementary material for: Using species richness calculations to model the global profile of unsampled pathogenic variants: Examples from BRCA1 and BRCA2
Source: PubMed Central journal article supplement (PMC9907816; doi:10.1371/journal.pone.0278010), 2023-02-08

**S1 Fig: Flow diagram of study search and selection procedure**

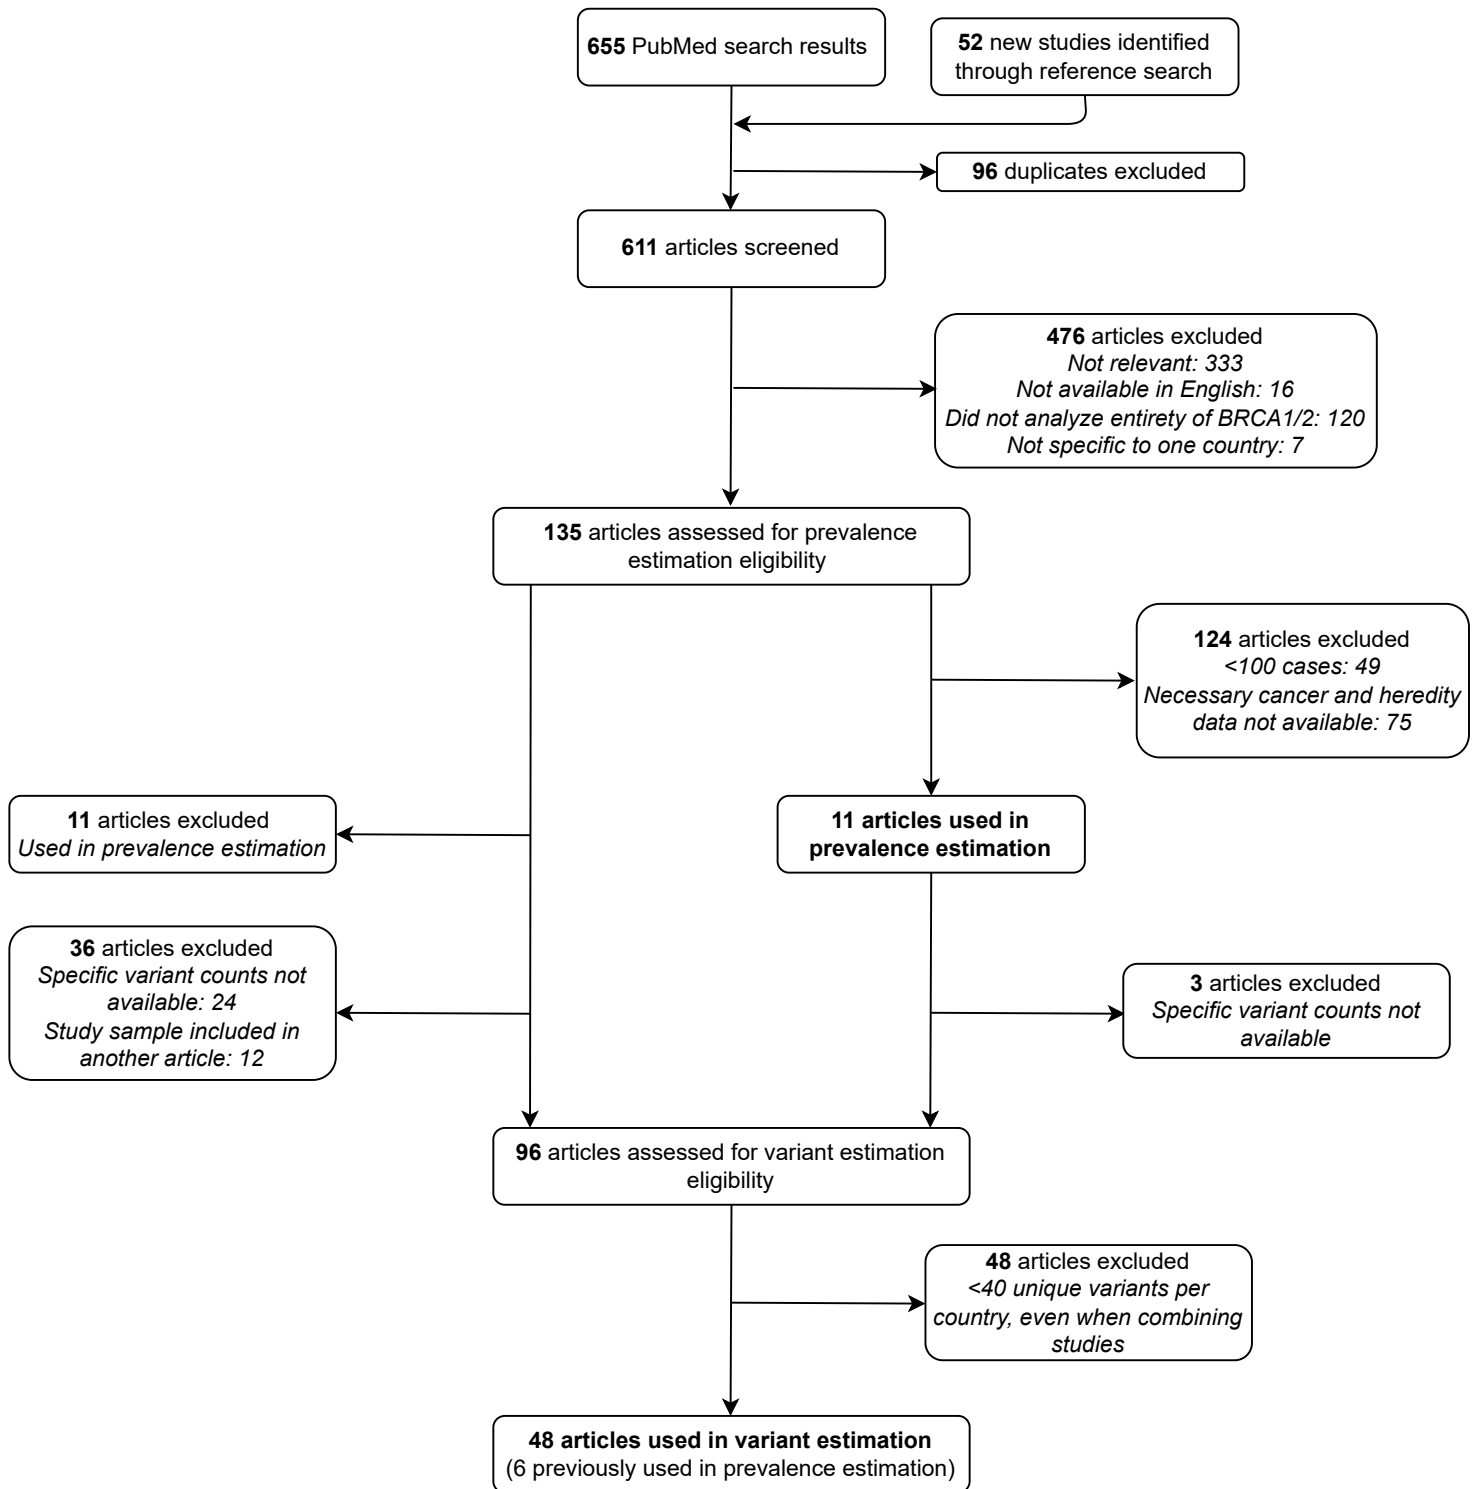

Supplement: pone.0278010.s001.pdf [file pone.0278010.s001.pdf]
